# Supplementary material
Source: PubMed Central journal article supplement (PMC3234974)
Supplement: supp_M111.259689_jbc.M111.259689-1.pdf [file supp_M111.259689_jbc.M111.259689-1.pdf]

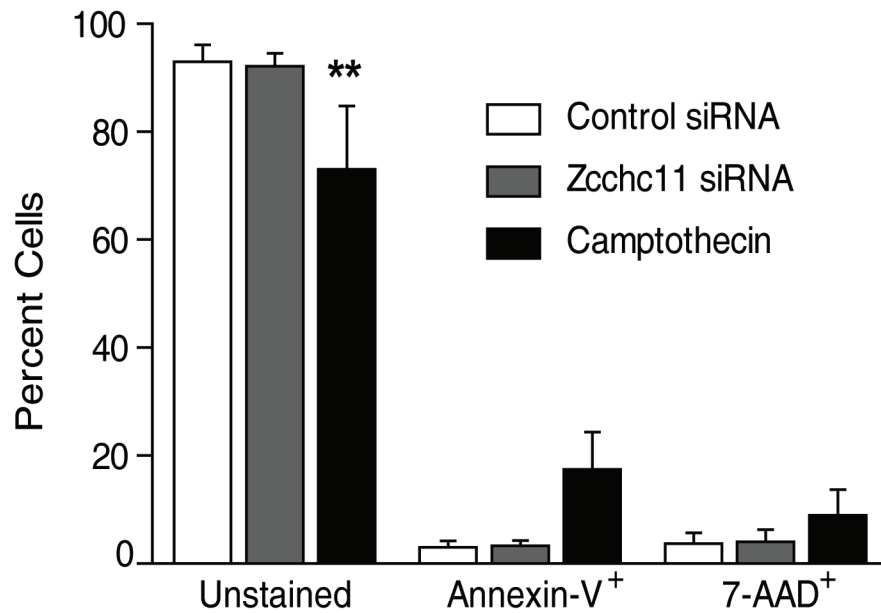

Supplemental Figure 1 A549 cells were treated with camptothecin (positive control, 24 h), control non-targeting siRNA or Zcchc11-targeting siRNA. 48 hours after transfection all cells were collected and stained with Annexin-V antibody and 7-AAD. Error bars indicated S.E. *versus* control treated cells from 3 separate experiments. \*\* indicated  $p < 0.01$  by two-way ANOVA with Bonferroni *post hoc* analysis.

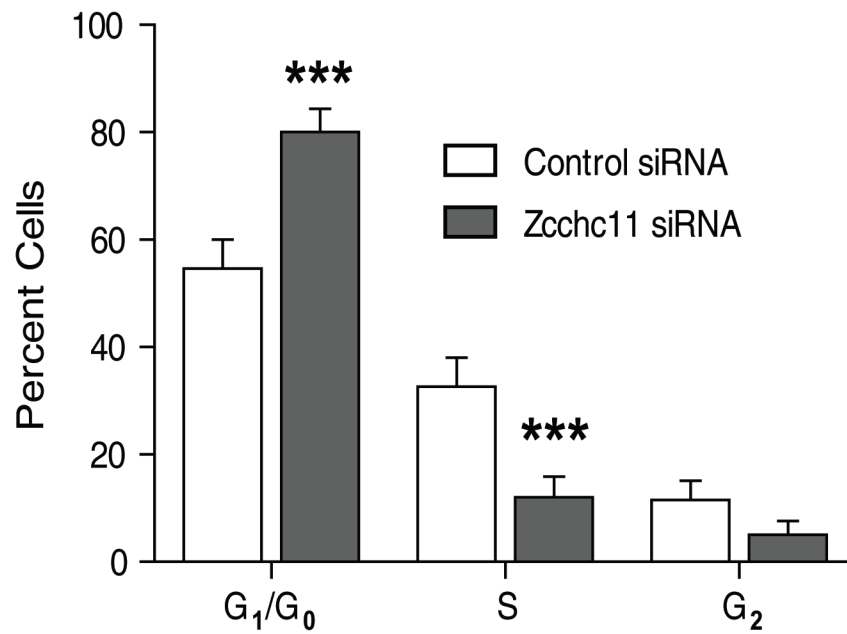

Supplemental Figure 2 A549 cells were treated with control or Zcchc11-targeting siRNA for 48 hours. Adherent cells were collected, stained with PI and their genomic DNA content was measured by flow cytometry. Error bars indicate S.E. from 3 separate experiments. \*\*\* indicates  $p < 0.001$  by two-way ANOVA with Bonferroni *post hoc* analysis.

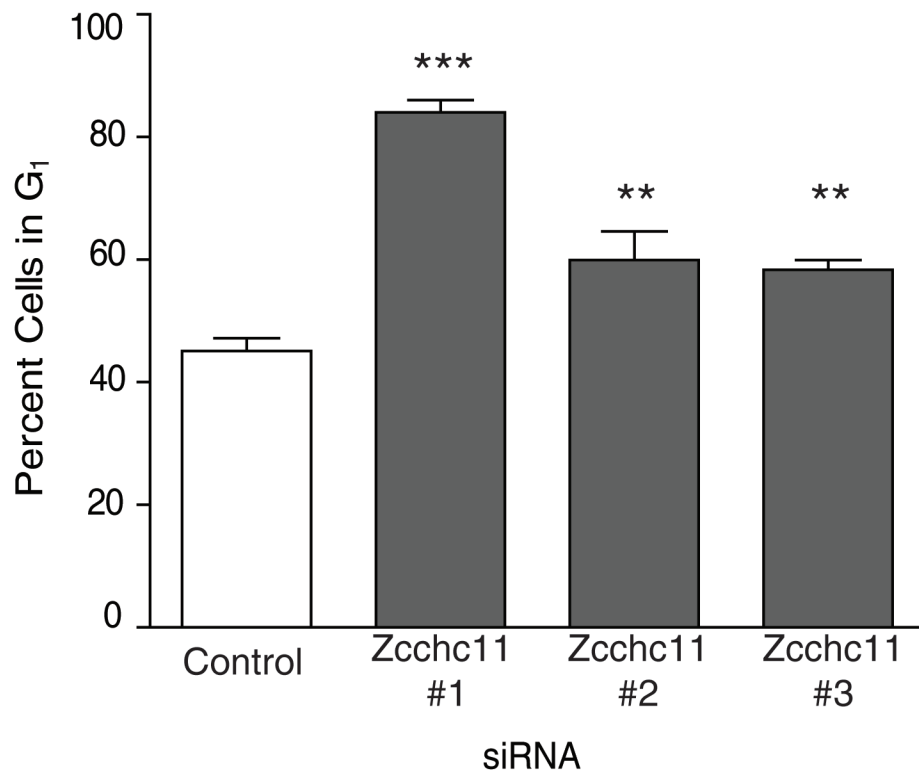

Supplemental Figure 3 H1299 cells were treated with control non-targeting or one of 3 different siRNAs targeting the *Zcchc11* transcript. Adherent cells were collected 72 hours after transfection and their DNA content was measured by PI staining. Error bars indicate S.E. from 3 separate experiments. \*\*\* indicates  $p < 0.001$  and \*\* indicated  $p < 0.01$  by two-way ANOVA with Bonferroni *post hoc* analysis.

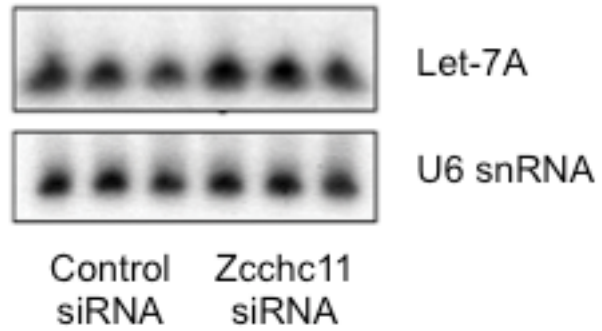

Supplemental Figure 4 Northern Blot for Let-7 expression in whole RNA isolated from H1299 cells following 48 hours of treatment with control of Zcchc11 targeting siRNA. U6 is included as a loading control.

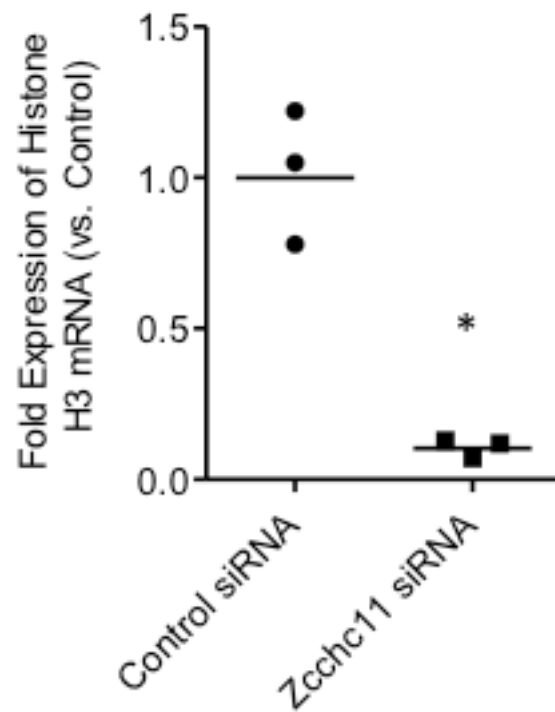

Supplemental Figure 5 Quantitative RT-PCR was used to measure Histone H3 mRNA content in H1299 RNA following 8 hours of treatment with control or Zcchc11 siRNA. Values are normalized to siRNA. \* indicates  $p < 0.05$  by student's T test.
